# Supplementary material for: Sleep Paralysis among Professional Firefighters and a Possible Association with PTSD—Online Survey-Based Study
Source: MDPI journal article supplement (doi:10.3390/ijerph18189442), 2021-09-07
Supplement: s1 [file s1]

**Table S1.** Correlation between anxiety symptoms and the number of SP episodes.

| <b>Self-Report<br/>Measures</b>               | <b>PCL</b> | <b>STAI-T</b> | <b>PSWQ</b> | <b>PSS-10</b> |
|-----------------------------------------------|------------|---------------|-------------|---------------|
| Number of SP<br>episodes in the<br>last month | 0.35       | 0.26          | 0.24        | 0.31          |
| Number of SP<br>episodes in the<br>last year  | 0.52       | 0.33          | 0.23        | 0.33          |
| Number of SP<br>episodes in one's<br>lifetime | 0.33       | 0.31          | -           | 0.26          |

Note. The correlation between anxiety symptoms and the number of SP symptoms is presented using the Spearman's rank correlation coefficient (rs). Significance coefficients,  $p < 0.05$ .
